# Supplementary material for: Post-Hoc Pattern-Oriented Testing and Tuning of an Existing Large Model: Lessons from the Field Vole
Source: PLoS One. 2012 Sep 25;7(9):e45872. doi: 10.1371/journal.pone.0045872 (PMC3457952; doi:10.1371/journal.pone.0045872)
Supplement: File S1 — Numeric real world data used for pattern sets 1–4. (XLSX) [file pone.0045872.s001.xlsx]

## Sheet: Sheet1
	Pattern Set 1
	P1.1 Sex ratio on day 90 (1:1 M:F)
	P1.2 Sex ratio on day 200 (1:1.95 M:F)
	P1.3 Mean breeding season female density of 75 females per Ha
	P1.4 & P1.5 - male and female age structure, fitting the data below:
	As raw numbers									As proportions
			May	June	July	Aug	Sept				May	June	July	Aug	Sept
	Male	Adult (>1yr)	11.5	21.1667	17	12.5	2.66667			Adult (>1yr)	482.517	470.37	465.753	295.276	67.7966
		Adult (<1yr)	0	6.5	11.1667	8.66667	5.33333			Adult (<1yr)	0	144.444	305.936	204.724	135.593
		Sub-adult	1.66667	3.66667	4	8.5	24			Sub-adult	69.9301	81.4815	109.589	200.787	610.169
		Young	10.6667	13.6667	4.33333	12.6667	7.33333			Young	447.552	303.704	118.721	299.213	186.441
			23.8333	45	36.5	42.3333	39.3333	187			1000	1000	1000	1000	1000
	Females	Adult (>1yr)	13	12	5	3.83333	0			Adult (>1yr)	406.25	191.489	75	51.9187	0
		Adult (<1yr)	6	35.6667	55.3333	55	22.3333			Adult (<1yr)	187.5	569.149	830	744.921	507.576
		Sub-adult	0	0	2.33333	3	15.6667			Sub-adult	0	0	35	40.6321	356.061
		Young	13	15	4	12	6			Young	406.25	239.362	60	162.528	136.364
			32	62.6667	66.6667	73.8333	44	279.167			1000
	Pattern Set 2
	Habitat/Season	Spr. Hedgebank/FieldMargin	Sum. Hedgebank/FieldMargin	Aut. Hedgebank/FieldMargin	Spr. Unmgr. Grass	Sum. Unmgr. Grass	Aut. Unmgr. Grass	Win. Unmgr. Grass	Sum. Setaside	Aut. Setaside	Spr. Perm. Pasture	Sum. Perm. Pasture	Aut. Perm. Pasture	Win. Perm. Pasture	Spr. Tussocky Pasture	Sum. Tussocky Pasture	Aut. Tussocky Pasture	Win. Tussocky Pasture	Aut. Young Forest	Sum. Rotational Crop	Aut. Rotational Crop	Spr Wood	Aut. Wood
	Log e (N)	2.30259	2.63906	1.95566	3.64814	4.08544	3.98034	3.78572	2.71467	2.61265	1.40718	1.29958	2.44772	2.55344	1.16544	1.53433	2.27707	1.85735	2.08987	0.244136	0.64283	0.796012	0.743466
	Pattern set 3
	P3.1 – Strong adult philopatry. Dispersal was only greater than two home-range diameters (males 90m, females 70m) for <2% for both males and females. Pattern fitted when both measures are less than 2%
	P3.2 – Mean distance moved between trapping was 10.2m ( ± 11.1m) and 9.0m ( ± 10.2m), males and females respectively. Pattern fitted when both measure lie within confidence limits.
	P3.3 – Mean maximum movement distances per individual were greater in males than females (28.6m ± 19.0m cf 22.4m ± 16.3). Pattern fitted when both measures lie within confidence limits.
	P3.4 – Natal dispersal distances were high. (Sandell et al., 1990) found 13.8 % of natal dispersal to be over 2 home-ranges, and 60% within 1 home range. Pattern fitted when both figures are matched to within ± 5 & 10% respectively.
	Pattern set 4
	As a result of landscape structural modifications only against a background of specialist predators, the model must be able to produce:
	1	Stable 5 year multi-annual fluctuations with amplitudes of around 3 ( calculated as loge(max N/min N) and a low phase of 2-4 years in between
	2	Less stable fluctuations with cycle length of 3-5 years with lower amplitude (~2)
	3	Non-stable fluctuations with low amplitudes (~1).
